# Supplementary material for: Morphometric features of gastric mucosa in atrophic gastritis: A different pattern between corpus and antrum
Source: PubMed Central journal article supplement (PMC10082242; doi:10.1097/md.0000000000033480), 2022-04-07
Supplement: medi-102-e33480-s003.pdf [file medi-102-e33480-s003.pdf]

Supplementary Table 1 Receiver operating characteristic table of corpus total mucosal thickness in diagnosing different degrees of corpus atrophy

| Cut-off value<br>(mm) | Mild + moderate + severe vs absent‡ |             |              | Moderate + severe vs absent + mild‡ |             |              | Severe vs absent + mild + moderate‡ |             |              |
|-----------------------|-------------------------------------|-------------|--------------|-------------------------------------|-------------|--------------|-------------------------------------|-------------|--------------|
|                       | Sensitivity                         | Specificity | Youden index | Sensitivity                         | Specificity | Youden index | Sensitivity                         | Specificity | Youden index |
| 0.70                  | 0.21                                | 0.89        | 0.10         | 0.22                                | 0.88        | 0.10         | 0.25                                | 0.87        | 0.12         |
| <b>0.75†</b>          | 0.27                                | 0.84        | 0.11         | 0.31                                | 0.83        | 0.14         | <b>0.33</b>                         | <b>0.82</b> | <b>0.15</b>  |
| <b>0.76†</b>          | <b>0.32</b>                         | <b>0.82</b> | <b>0.14</b>  | <b>0.33</b>                         | <b>0.82</b> | <b>0.15</b>  | 0.35                                | 0.8         | 0.15         |
| 0.80                  | 0.36                                | 0.76        | 0.12         | 0.37                                | 0.75        | 0.12         | 0.39                                | 0.74        | 0.13         |
| 0.90                  | 0.5                                 | 0.58        | 0.08         | 0.51                                | 0.57        | 0.08         | 0.55                                | 0.57        | 0.12         |
| 0.95                  | 0.59                                | 0.49        | 0.08         | 0.59                                | 0.48        | 0.07         | 0.64                                | 0.48        | 0.12         |
| 1.00                  | 0.69                                | 0.40        | 0.09         | 0.68                                | 0.39        | 0.07         | 0.71                                | 0.39        | 0.10         |
| 1.10                  | 0.77                                | 0.28        | 0.05         | 0.77                                | 0.27        | 0.04         | 0.78                                | 0.27        | 0.05         |
| 1.20                  | 0.87                                | 0.18        | 0.05         | 0.87                                | 0.18        | 0.05         | 0.88                                | 0.17        | 0.05         |
| 1.23                  | 0.89                                | 0.16        | 0.05         | 0.89                                | 0.16        | 0.05         | 0.90                                | 0.16        | 0.06         |
| 1.25                  | 0.89                                | 0.15        | 0.04         | 0.90                                | 0.14        | 0.04         | 0.90                                | 0.14        | 0.04         |
| 1.30                  | 0.93                                | 0.10        | 0.03         | 0.94                                | 0.1         | 0.04         | 0.92                                | 0.10        | 0.02         |
| 1.40                  | 0.96                                | 0.05        | 0.01         | 0.96                                | 0.05        | 0.01         | 0.94                                | 0.04        | -0.02        |

Sensitivity and specificity were calculated by receiver-operating characteristic analysis.

†The optimal cut-off values were determined by Youden index and shown in bold.

‡Gastric mucosal atrophy degree.

Vs, versus.
