# Supplementary material for: Morphometric features of gastric mucosa in atrophic gastritis: A different pattern between corpus and antrum
Source: PubMed Central journal article supplement (PMC10082242; doi:10.1097/md.0000000000033480), 2022-04-07
Supplement: medi-102-e33480-s004.pdf [file medi-102-e33480-s004.pdf]

Supplementary Table 2 Receiver operating characteristic table of antral total mucosal thickness in diagnosing different degrees of antral atrophy

| Cut-off value<br>(mm) | Mild + moderate + severe vs absent‡ |             |              | Moderate + severe vs absent + mild‡ |             |              | Severe vs absent + mild + moderate‡ |             |              |
|-----------------------|-------------------------------------|-------------|--------------|-------------------------------------|-------------|--------------|-------------------------------------|-------------|--------------|
|                       | Sensitivity                         | Specificity | Youden index | Sensitivity                         | Specificity | Youden index | Sensitivity                         | Specificity | Youden index |
| 0.70                  | 0.14                                | 0.86        | 0.00         | 0.14                                | 0.85        | -0.01        | 0.16                                | 0.86        | 0.02         |
| 0.75                  | 0.18                                | 0.84        | 0.02         | 0.18                                | 0.84        | 0.02         | 0.19                                | 0.83        | 0.02         |
| 0.76                  | 0.19                                | 0.84        | 0.03         | 0.19                                | 0.84        | 0.03         | 0.19                                | 0.82        | 0.01         |
| 0.80                  | 0.23                                | 0.81        | 0.04         | 0.23                                | 0.80        | 0.03         | 0.23                                | 0.79        | 0.02         |
| 0.90                  | 0.37                                | 0.73        | 0.10         | 0.36                                | 0.70        | 0.06         | 0.34                                | 0.66        | 0.00         |
| 0.95                  | 0.45                                | 0.68        | 0.13         | 0.44                                | 0.62        | 0.06         | 0.44                                | 0.59        | 0.03         |
| 1.00                  | 0.52                                | 0.61        | 0.13         | 0.51                                | 0.56        | 0.07         | 0.52                                | 0.53        | 0.05         |
| <b>1.03†</b>          | 0.56                                | 0.58        | 0.14         | 0.55                                | 0.53        | 0.08         | <b>0.58</b>                         | <b>0.50</b> | <b>0.08</b>  |
| <b>1.08†</b>          | 0.62                                | 0.53        | 0.15         | <b>0.62</b>                         | <b>0.49</b> | <b>0.11</b>  | 0.61                                | 0.44        | 0.05         |
| 1.10                  | 0.64                                | 0.49        | 0.13         | 0.63                                | 0.43        | 0.06         | 0.62                                | 0.40        | 0.02         |
| 1.20                  | 0.75                                | 0.41        | 0.16         | 0.74                                | 0.34        | 0.08         | 0.72                                | 0.29        | 0.01         |
| <b>1.23†</b>          | <b>0.79</b>                         | <b>0.40</b> | <b>0.19</b>  | 0.78                                | 0.33        | 0.11         | 0.76                                | 0.27        | 0.03         |
| 1.25                  | 0.81                                | 0.36        | 0.17         | 0.80                                | 0.30        | 0.10         | 0.78                                | 0.24        | 0.02         |
| 1.30                  | 0.85                                | 0.27        | 0.12         | 0.84                                | 0.20        | 0.04         | 0.83                                | 0.18        | 0.01         |
| 1.40                  | 0.89                                | 0.18        | 0.07         | 0.87                                | 0.13        | 0.00         | 0.87                                | 0.13        | 0.00         |

Sensitivity and specificity were calculated by receiver-operating characteristic analysis.

†The optimal cut-off values were determined by Youden index and shown in bold.

‡Gastric mucosal atrophy degree.

Vs, versus.
