# Supplementary material for: Morphometric features of gastric mucosa in atrophic gastritis: A different pattern between corpus and antrum
Source: PubMed Central journal article supplement (PMC10082242; doi:10.1097/md.0000000000033480), 2022-04-07
Supplement: medi-102-e33480-s005.pdf [file medi-102-e33480-s005.pdf]

Supplementary Table 3 Comparison of corpus mucosal thickness stratified by activity and atrophy grade

| Parameters (mm)            | Atrophic grade ( <i>n</i> = active/inactive) |                       |                       |                       | Spearman correlation |                  |                |
|----------------------------|----------------------------------------------|-----------------------|-----------------------|-----------------------|----------------------|------------------|----------------|
|                            | 0 ( <i>n</i> = 85/587)                       | 1 ( <i>n</i> = 32/52) | 2 ( <i>n</i> = 43/45) | 3 ( <i>n</i> = 25/74) | <i>r<sub>s</sub></i> | (CI 95%)         | <i>P</i> value |
| Foveolar length            |                                              |                       |                       |                       |                      |                  |                |
| Active ( <i>n</i> = 185)   | 0.37 (0.26, 0.45)*                           | 0.34 (0.24, 0.46)     | 0.40 (0.33, 0.51)     | 0.37 (0.29, 0.53)     | 0.104                | -0.045 to 0.249  | 0.158          |
| Inactive ( <i>n</i> = 758) | 0.28 (0.21, 0.38)                            | 0.31 (0.24, 0.39)     | 0.34 (0.24, 0.45)     | 0.39 (0.30, 0.51)     | 0.216                | 0.145 to 0.285   | < 0.001        |
| Glandular length           |                                              |                       |                       |                       |                      |                  |                |
| Active ( <i>n</i> = 185)   | 0.58 (0.48, 0.73)                            | 0.52 (0.36, 0.65)     | 0.43 (0.33, 0.50)*    | 0.34 (0.26, 0.49)     | -0.453               | -0.564 to -0.327 | < 0.001        |
| Inactive ( <i>n</i> = 758) | 0.55 (0.44, 0.68)                            | 0.44 (0.35, 0.60)     | 0.34 (0.27, 0.46)     | 0.33 (0.26, 0.43)     | -0.394               | -0.454 to -0.330 | 0.000          |
| Musculus mucosae thickness |                                              |                       |                       |                       |                      |                  |                |
| Active ( <i>n</i> = 185)   | 0.08 (0.06, 0.13)                            | 0.10 (0.07, 0.13)     | 0.12 (0.09, 0.18)*    | 0.12 (0.08, 0.23)     | 0.297                | 0.155 to 0.427   | < 0.001        |
| Inactive ( <i>n</i> = 758) | 0.08 (0.05, 0.12)                            | 0.09 (0.05, 0.14)     | 0.09 (0.07, 0.15)     | 0.13 (0.08, 0.18)     | 0.179                | 0.107 to 0.250   | < 0.001        |
| Total mucosal thickness    |                                              |                       |                       |                       |                      |                  |                |
| Active ( <i>n</i> = 185)   | 1.04 (0.88, 1.25)*                           | 1.00 (0.80, 1.13)     | 1.01 (0.75, 1.18)*    | 0.95 (0.73, 1.19)     | -0.160               | -0.301 to -0.012 | 0.029          |
| Inactive ( <i>n</i> = 758) | 0.93 (0.79, 1.11)                            | 0.87 (0.76, 0.98)     | 0.86 (0.72, 0.98)     | 0.86 (0.69, 1.01)     | -0.149               | -0.220 to -0.076 | < 0.001        |

Data expressed as median and interquartile range (IQR). Four grades: 0 = none or minimal, 1 = mild, 2 = moderate, and 3 = severe.

Active group included activity grade 1, 2, and 3. Inactive group referred to activity grade 0.

The correlation coefficient ( $r_s$ ) between the mucosal thickness and atrophy degrees was calculated by Spearman rank correlation.

\* $p < 0.05$  active versus inactive groups at the same grade of atrophy by Mann-Whitney U test.

CI, confidence interval.
