# Supplementary material for: Morphometric features of gastric mucosa in atrophic gastritis: A different pattern between corpus and antrum
Source: PubMed Central journal article supplement (PMC10082242; doi:10.1097/md.0000000000033480), 2022-04-07
Supplement: medi-102-e33480-s006.pdf [file medi-102-e33480-s006.pdf]

Supplementary Table 4 Comparison of antral mucosal thickness stratified by activity and atrophy grade

| Parameters (mm)                   | Atrophy grade ( <i>n</i> = active/inactive) |                      |                       |                       | Spearman correlation |                  |                |
|-----------------------------------|---------------------------------------------|----------------------|-----------------------|-----------------------|----------------------|------------------|----------------|
|                                   | 0 ( <i>n</i> = 17/73)                       | 1 ( <i>n</i> = 7/25) | 2 ( <i>n</i> = 44/68) | 3 ( <i>n</i> = 35/67) | <i>r<sub>s</sub></i> | (CI 95%)         | <i>P</i> value |
| <b>Foveolar length</b>            |                                             |                      |                       |                       |                      |                  |                |
| Active ( <i>n</i> = 103)          | 0.57 (0.44, 0.71)                           | 0.48 (0.43, 0.61)    | 0.41 (0.35, 0.60)     | 0.44 (0.35, 0.53)     | -0.202               | -0.386 to -0.003 | 0.040          |
| Inactive ( <i>n</i> = 233)        | 0.50 (0.36, 0.68)                           | 0.42 (0.29, 0.53)    | 0.47 (0.36, 0.60)     | 0.42 (0.34, 0.51)     | -0.129               | -0.257 to 0.003  | 0.049          |
| <b>Glandular length</b>           |                                             |                      |                       |                       |                      |                  |                |
| Active ( <i>n</i> = 103)          | 0.41 (0.36, 0.51)                           | 0.40 (0.30, 0.48)    | 0.36 (0.24, 0.50)     | 0.35 (0.29, 0.46)     | -0.163               | -0.351 to 0.037  | 0.099          |
| Inactive ( <i>n</i> = 233)        | 0.38 (0.25, 0.47)                           | 0.34 (0.23, 0.47)    | 0.33 (0.27, 0.47)     | 0.38 (0.27, 0.47)     | 0.043                | -0.090 to 0.174  | 0.518          |
| <b>Musculus mucosae thickness</b> |                                             |                      |                       |                       |                      |                  |                |
| Active ( <i>n</i> = 103)          | 0.12 (0.09, 0.18)                           | 0.12 (0.06, 0.15)    | 0.13 (0.08, 0.19)     | 0.17 (0.10, 0.27)     | 0.169                | -0.031 to 0.356  | 0.088          |
| Inactive ( <i>n</i> = 233)        | 0.15 (0.11, 0.23)                           | 0.16 (0.12, 0.21)    | 0.16 (0.11, 0.23)     | 0.18 (0.12, 0.23)     | 0.050                | -0.083 to 0.181  | 0.448          |
| <b>Total mucosal thickness</b>    |                                             |                      |                       |                       |                      |                  |                |
| Active ( <i>n</i> = 103)          | 1.2 (0.44, 0.71)                            | 0.92 (0.84, 1.17)    | 1.01 (0.80, 1.21)     | 1.00 (0.77, 1.25)     | -0.138               | -0.329 to 0.062  | 0.163          |
| Inactive ( <i>n</i> = 233)        | 1.05 (0.84, 1.37)                           | 0.97 (0.79, 1.12)    | 1.00 (0.82, 1.20)     | 0.98 (0.84, 1.21)     | -0.064               | -0.194 to 0.069  | 0.334          |

Data expressed as median and interquartile range (IQR). Four grades: 0 = none or minimal, 1 = mild, 2 = moderate, and 3 = severe.

Active group included activity grade 1, 2, and 3. Inactive group referred to activity grade 0.

The correlation coefficient ( $r_s$ ) between the mucosal thickness and atrophy degrees was calculated by Spearman rank correlation.

No statistical differences were found between active and inactive groups at the same grade of atrophy by Mann-Whitney U test.

CI, confidence interval.
